# Supplementary material for: CarsiDock: a deep learning paradigm for accurate protein–ligand docking and screening based on large-scale pre-training
Source: Royal Society of Chemistry journal article supplement (doi:10.1039/d3sc05552c), 2023-12-19
Supplement: d3sc05552c1.pdf [file d3sc05552c1.pdf]

## Supporting Information

### The details algorithms of the triangular self-attention mechanism

For the atom representation for atom  $i$  ( $h_i^{last}$ ) and the pair representation for atom pair  $ij$  ( $q_{ij}^{last}$ ) from the last layer, a series of operations are exerted, including the “Outer product mean” operation to transform atom representation into an update for the pair representation, the “Triangular multiplicative update” operation to update the pair representation by combining information within each triangle of atom pairs  $ij$ ,  $ik$  and  $jk$ , the “Triangular self-attention” operation to further update the pair representation, and a transition layer to output the final pair representation.

#### 1. Outer product mean

$$a_i = W_a(LN(h_i^{last})), \quad b_i = W_b(LN(h_i^{last})) \quad (1)$$

$$z_{ij} = q_{ij}^{last} + W_c(flatten(a_i \otimes b_i)) \quad (2)$$

where  $W_a, W_b \in R^{H \times d}$  and  $W_c \in R^{H \times 2H}$  are weight matrices;  $LN$ ,  $flatten$  and  $\otimes$  denote the layer normalization, flatten and outer product operations;  $d$  and  $H$  denotes the hidden dimension and the number of attention head in Transformer encoder, respectively.

#### 2. Triangular multiplicative update

This operation has two symmetric versions, one for the “outgoing” edges and one for the “incoming” edges.

##### 2.1. Triangular multiplicative update using “outgoing” edges

$$a_{ik} = Sigmoid(W_{a1}LN(z_{ik})) \odot W_{a2}LN(z_{ik}) \quad (3)$$

$$b_{jk} = Sigmoid(W_{b1}LN(z_{jk})) \odot W_{b2}LN(z_{jk}) \quad (4)$$

$$g_{ij} = Sigmoid(W_{g1}LN(z_{ij})) \quad (5)$$

$$z_{ij} = z_{ij} + g_{ij} \odot W_{g2}LN\left(\sum_k a_{ik} \odot b_{jk}\right) \quad (6)$$

where  $W_{a1}, W_{a2}, W_{b1}, W_{b2}, W_{g1}, W_{g2} \in R^{H \times H}$  are weight matrices;  $LN$  denotes

layer normalization;  $\odot$  denotes inner product; *Sigmoid* is a nonlinear activation;  $H$  denotes the number of attention head in Transformer encoder.

2.2. Triangular multiplicative update using “incoming” edges

$$a_{ki} = \text{Sigmoid}(W_{a3}LN(z_{ki})) \odot W_{a4}LN(z_{ki}) \quad (7)$$

$$b_{kj} = \text{Sigmoid}(W_{b3}LN(z_{kj})) \odot W_{b4}LN(z_{kj}) \quad (8)$$

$$g_{ij} = \text{Sigmoid}(W_{g3}LN(z_{ij})) \quad (9)$$

$$z_{ij} = z_{ij} + g_{ij} \odot W_{g4}LN\left(\sum_k a_{ki} \odot b_{kj}\right) \quad (10)$$

where  $W_{a3}, W_{a4}, W_{b3}, W_{b4}, W_{g3}, W_{g4} \in R^{H \times H}$  are weight matrices; *LN* denotes layer normalization;  $\odot$  denotes inner product; *Sigmoid* is a nonlinear activation;  $H$  denotes the number of attention head in Transformer encoder.

3. Triangular self-attention

This operation also has two symmetric versions, one for the “starting” nodes and one for the “ending” nodes.

3.1. Triangular gated self-attention around starting node

$$Q_{ij}^h = W_{Q1}(LN(z_{ij})) \quad (11)$$

$$K_{ik}^h = W_{K1}(LN(z_{ik})) \quad (12)$$

$$V_{ik}^h = W_{V1}(LN(z_{ik})) \quad (13)$$

$$B_{jk}^h = W_{B1}(LN(z_{jk})) \quad (14)$$

$$g_{ij}^h = \text{Sigmoid}(W_{g5}LN(z_{ij})) \quad (15)$$

$$z_{ij} = z_{ij} + W_{g6} \left( \text{Concat}_{h \in 1, \dots, N_h} \left( g_{ij}^h \odot \sum_k \text{Softmax}_k \left( \frac{(Q_{ij}^h)^T K_{ik}^h}{\sqrt{d_h}} + B_{jk}^h \right) V_{ik}^h \right) \right) \quad (16)$$

where  $W_{Q1}, W_{K1}, W_{V1}, W_{B1}, W_{g5} \in R^{d_h \times H}$ ,  $W_{g6} \in R^{H \times d_h}$  are weight matrices; *LN* denotes layer normalization;  $\odot$  denotes inner product; *Concat* denotes concatenation operation; *Softmax* denotes softmax operation; *Sigmoid* is a nonlinear activation;  $H$  denotes the number of attention head in Transformer encoder;

$h \in 1, \dots, N_h$  denotes the number of attention head here;  $d_h$  denotes the dimension of each head here.

### 3.2 Triangular gated self-attention around ending node

$$Q_{ij}^h = W_{Q2}(LN(z_{ij})) \quad (17)$$

$$K_{ki}^h = W_{K2}(LN(z_{ki})) \quad (18)$$

$$V_{kj}^h = W_{V2}(LN(z_{kj})) \quad (19)$$

$$B_{ki}^h = W_{B2}(LN(z_{ki})) \quad (20)$$

$$g_{ij}^h = \text{Sigmoid}(W_{g7}LN(z_{ij})) \quad (21)$$

$$z_{ij} = z_{ij} + W_{g8} \left( \text{Concat}_{h \in 1, \dots, N_h} \left( g_{ij}^h \odot \sum_k \text{Softmax}_k \left( \frac{(Q_{ij}^h)^T K_{ki}^h}{\sqrt{d_h}} + B_{ki}^h \right) V_{kj}^h \right) \right) \quad (22)$$

where  $W_{Q2}, W_{K2}, W_{V2}, W_{B2}, W_{g7} \in R^{d_h \times H}$ ,  $W_{g8} \in R^{H \times d_h}$  are weight matrices;  $LN$  denotes layer normalization;  $\odot$  denotes inner product;  $\text{Concat}$  denotes concatenation operation;  $\text{Softmax}$  denotes softmax operation;  $\text{Sigmoid}$  is a nonlinear activation;  $H$  denotes the number of attention head in Transformer encoder;  $h \in 1, \dots, N_h$  denotes the number of attention head here;  $d_h$  denotes the dimension of each head here.

### 4. Transition layer

$$z_{ij} = z_{ij} + W_{T2}(\text{RELU}(W_{T1}(LN(z_{ij})))) \quad (23)$$

where  $W_{T1} \in R^{2H \times H}$ ,  $W_{T2} \in R^{H \times 2H}$  are weight matrices;  $LN$  denotes layer normalization;  $\text{RELU}$  is a nonlinear activation;  $H$  denotes the number of attention head in Transformer encoder.

Table S1. Impacts of two data argumentation strategies on the docking accuracy based on the PDBbind-CrossDocked-Core, APOBind Core and PoseBusters datasets.

| Strategy                   | PDBbind-CrossDocked-Core |                  | APOBind Core           |                  | PoseBusters           |                                  |
|----------------------------|--------------------------|------------------|------------------------|------------------|-----------------------|----------------------------------|
|                            | Top1 success rates (%)   | Average RMSD (Å) | Top1 success rates (%) | Average RMSD (Å) | RMSD $\leq$ 2.0 Å (%) | RMSD $\leq$ 2.0 Å & PB-Valid (%) |
| Without data argumentation | <b>80.91</b>             | <b>1.543</b>     | <b>65.94</b>           | <b>2.094</b>     | <b>83.4</b>           | <b>54.4</b>                      |
| <b>CarsiDock</b>           | 75.09                    | 1.734            | 50.66                  | 2.778            | 79.7                  | 47.7                             |

Table S2. The crucial hyperparameter settings for CarsiDock

| Hyperparameters                                                                | Settings                     |                               |                        |
|--------------------------------------------------------------------------------|------------------------------|-------------------------------|------------------------|
|                                                                                | Pre-training                 | Fine-tuning                   | Inference <sup>a</sup> |
| Weight of distance loss for protein-ligand atom pairs ( $w_{cross\_dist}$ )    | 1.0                          | Teacher: 1.0;<br>Student: 1.0 | 1.0                    |
| Weight of distance loss for intramolecular pairs in ligand ( $w_{lig\_dist}$ ) | 1.0                          | Teacher: 0.1;<br>Student: 1.0 | 1.0                    |
| Weight for MDN loss ( $w_{MDN}$ )                                              | 1.0                          | Teacher: 0.1;<br>Student: 0.1 | -                      |
| Weight for distillation loss ( $w_{distillation}$ )                            | -                            | 0.1                           | -                      |
| Dimension of hidden representations ( $d$ )                                    | 768                          | 768                           | 768                    |
| Number of attention heads ( $H$ )                                              | 16                           | 16                            | 16                     |
| Number of layers for protein encoder                                           | 6                            | 6                             | 6                      |
| Number of layers for ligand encoder                                            | 6                            | 6                             | 6                      |
| Number of layers for interactive encoder                                       | 6                            | 6                             | 6                      |
| Number of recycles for interactive encoder                                     | 3                            | 3                             | 3                      |
| Threshold for the calculation of protein-ligand distance <sup>b</sup>          | Training: 8;<br>Prediction:6 | Training: 8;<br>Prediction:6  | Prediction:6           |
| Learning rate                                                                  | 1e-4                         | 5e-5                          | 1e-3                   |
| Batch size                                                                     | 96                           | 16                            |                        |
| Epoch                                                                          | 10                           | 50                            |                        |
| Weight decay                                                                   | 1e-4                         | 1e-6                          | 0                      |
| Ratio of warmup phase to the total phase                                       | 0.05                         | 0.05                          | No warmup              |
| Initial learning rate for warmup phase                                         | 1e-8                         | 5e-9                          | No warmup              |
| Optimizer                                                                      | AdamW                        | AdamW                         | LBFGS                  |

<sup>a</sup>: These hyperparameters are employed in the geometry optimization stage where the distance matrices are reconstructed to a binding pose.

<sup>b</sup>: Only the protein-ligand atom pairs within the threshold are considered for loss calculation. The threshold is set to 8.0 for model training while the value turns to 6.0 for prediction.

Table S3. Runtimes of two different versions of CarsiDock on PDBbind-v2016 core set.

| Version | Inference time (s) | Conversion time (s) | Total time (s) <sup>a</sup> |
|---------|--------------------|---------------------|-----------------------------|
| CPU     | 1.96 ± 0.32        | 158.39 ± 259.02     | 160.35 ± 259.17             |
| GPU     | 1.27 ± 0.30        | 4.68 ± 2.21         | 5.95 ± 2.43                 |

<sup>a</sup>: The experiment is tested on a single-core single-card NVIDIA Geforce RTX 3090 machine.

Table S4. The impact of the number of initial conformers yielded by RDKit (OpenBabel) on the docking accuracy of CarsiDock on PDBbind-v2016 core set.

| Number of initial conformers | Top1 success rates (%) | Average RMSD (Å) |
|------------------------------|------------------------|------------------|
| 1                            | 68.07                  | 2.513            |
| 2                            | 87.37                  | 1.243            |
| 3                            | 89.82                  | 1.206            |
| 4                            | 89.82                  | 1.191            |
| 5                            | <b>90.18</b>           | 1.182            |
| 10                           | 89.82                  | <b>1.165</b>     |
| 10 (OpenBabel)               | 86.92                  | 1.284            |

Table S5. The impact of initial conformers on the docking accuracy of different docking approaches on PDBbind-v2016 core set.

| Methods               | Using crystal pose coordinates<br>as initial ligand coordinates |                                     | Using 10 conformers yielded<br>with the ETKDG algorithm |                     |
|-----------------------|-----------------------------------------------------------------|-------------------------------------|---------------------------------------------------------|---------------------|
|                       | Top1 success rates<br>(%)                                       | Average<br>RMSD<br>(Å) <sup>a</sup> | Top1 success<br>rates (%)                               | Average<br>RMSD (Å) |
| Glide SP              | 66.67                                                           | 2.200                               | 64.91                                                   | 2.206               |
| Glide XP              | 68.07                                                           | 2.112                               | 65.61                                                   | 2.218               |
| AutoDock4             | 55.79                                                           | 2.966                               | 46.74                                                   | 3.449               |
| AutoDock Vina         | 64.21                                                           | 2.332                               | 52.28                                                   | 3.091               |
| Vinardo               | 61.75                                                           | 2.743                               | 48.07                                                   | 3.643               |
| AutoDock-GPU          | 49.46                                                           | 3.798                               | 39.86                                                   | 4.189               |
| Vina-GPU              | 60.00                                                           | 2.646                               | 51.23                                                   | 2.989               |
| Gnina                 | 75.09                                                           | 1.486                               | 72.63                                                   | 1.875               |
| DeepDock              | 36.14                                                           | 3.892                               | 44.91                                                   | 3.550               |
| TankBind              | 70.18                                                           | 1.866                               | 68.42                                                   | 1.860               |
| EDM-Dock <sup>b</sup> | 45.26                                                           | 2.686                               | 46.32                                                   | 2.631               |
| <b>CarsiDock</b>      | <b>94.74</b>                                                    | <b>0.675</b>                        | <b>89.82</b>                                            | <b>1.165</b>        |

<sup>a</sup>: the complexes failing in docking are directly omitted to calculate the average RMSD.

<sup>b</sup>: the pose with the lowest RMSD value across the 10 runs are simply employed as the final pose when fed with 10 initial conformers.

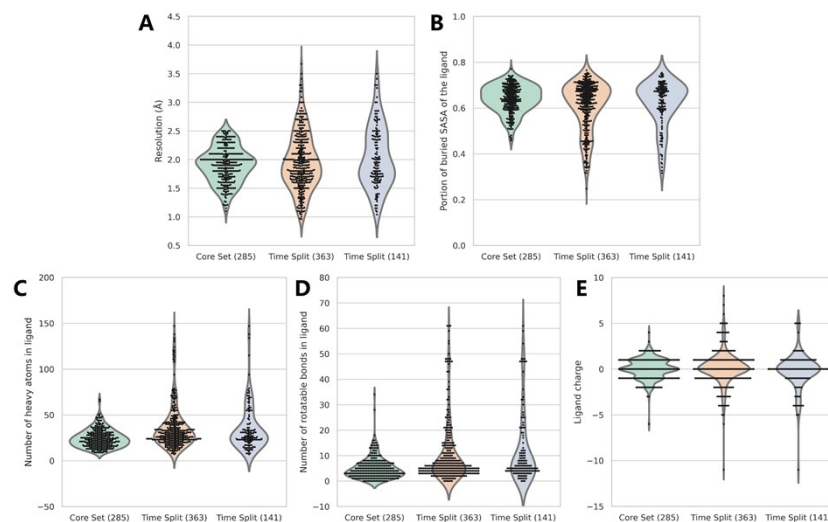

Figure S1. Multiple properties including (A) the X-ray resolution of the complex structure, (B) portion of buried SASA of the ligand, (C) number of heavy atoms in ligand, (D) number of rotatable bonds in ligand, and (E) ligand net charge of the PDBbind-v2016 core set, time-split set of the PDBbind-v2020 dataset, and new receptors on the time-split set.



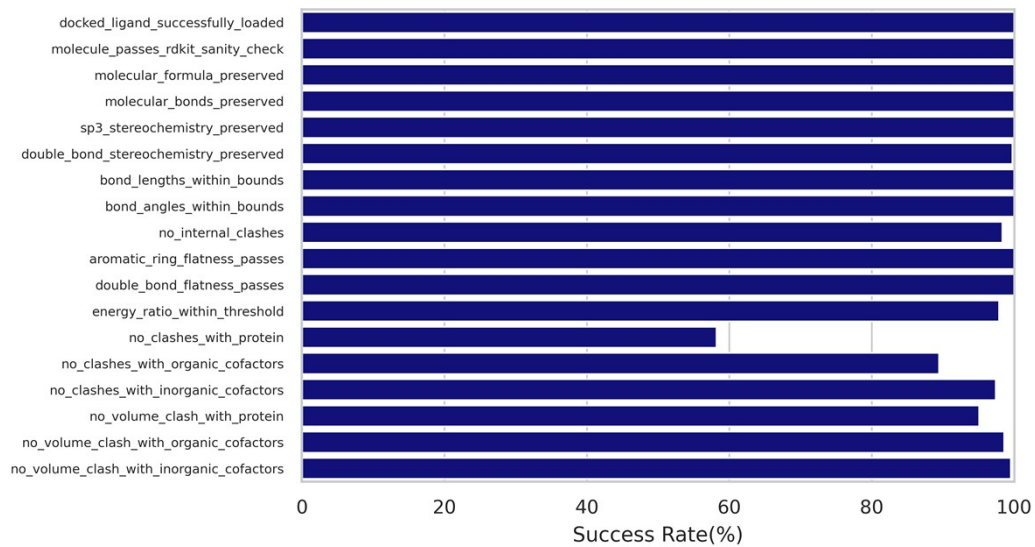

Figure S2. Success rates of CarsiDock passing the different checks in PoseBusters benchmark set.



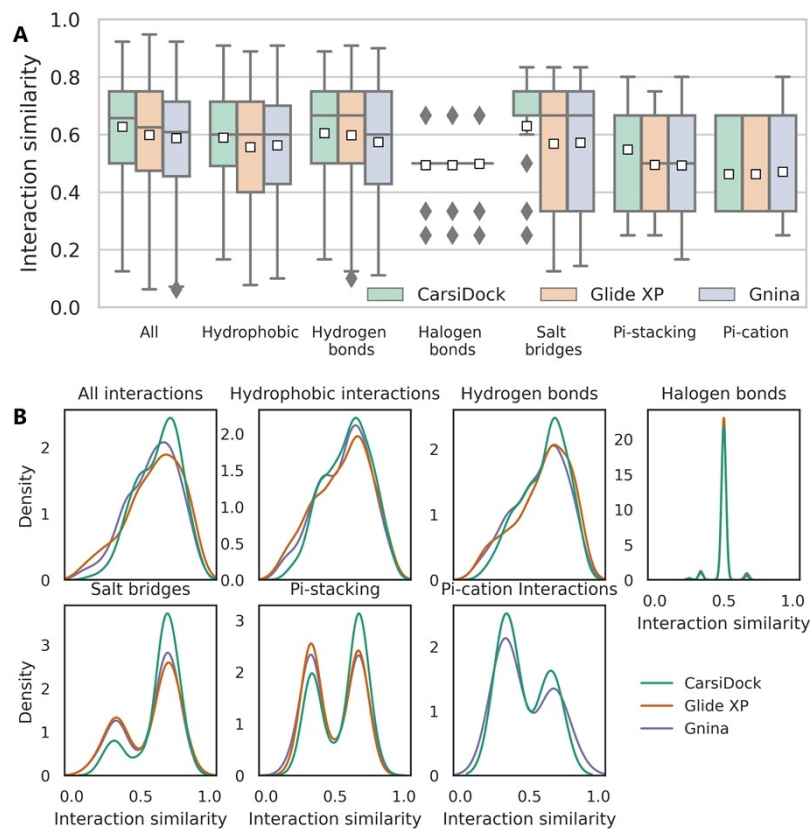

Figure S4. (A) Interaction similarity at the residue level and (B) the corresponding distributions for seven types of interactions of the poses predicted by three docking programs, including all interactions, hydrophobic interactions, hydrogen bonds, halogen bonds, salt bridges, pi-stacking, and pi-cation interactions. The white square in the box plot represents the mean value of each statistics.
